# Supplementary material
Source: MDPI journal article supplement (https://www.mdpi.com/2073-4395/13/2/596)
Supplement: s1 [file s1 › Figure S1~S2.pdf]

|         |                                                                      |     |
|---------|----------------------------------------------------------------------|-----|
| GmERF54 | MANNSGKSNKEGVETQLKVICSEGGWEEKKGGKRLDLSGRRQWKFVFDASVSHRPLKRTSPDPEN    | 70  |
| AtERF53 | MAIAKMGKSIKRLGTSEAEKKEMLEDEPTSSGKYKDSGPGSDMWLGASSTSPKSLKTRNFDLRN     | 54  |
| GmERF54 | ENQQQQQPSMLSLQPPSSRIVPPFAFESCHFMFPFHPFGITLPLFRPPLHPTQKISFSPSNMGY     | 140 |
| AtERF53 | PYLSSSATPQPPITTTCSVSFPYLPALQQRFLHNPDSGRQQQMISFDQQLWQPYWAQH           | 124 |
| GmERF54 | PPFLAPESTMPHEHQDQDQQLQYVSDALMLSPRGMMMDNRTE—GRQMLRPQAPLNATKLYRGVR     | 207 |
| AtERF53 | —DQDQQLQYVSDALMLSPRGMMMDNRTE—GRQMLRPQAPLNATKLYRGVR                   | 194 |
| GmERF54 | QRHWGKWAETIRPFRNTRLWLGTFTDAEAAMAYDREAFKLRGENANLFFPELFLNKDKAEQSITAPAS | 277 |
| AtERF53 | QRHWGKWAETIRPFRNTRLWLGTFTDAEAAMAYDREAFKLRGENANLFFPELFLNKDEFTFVHQKQCE | 264 |
| GmERF54 | SSNEGTSSTQNTKPEPIPECTINTESDMPFTETFAVENAVTEEGISQFQELVWGEWFAIAPAGWPGGS | 347 |
| AtERF53 | IGTISEDSSRRGEDDSSTALVGGVSEETG—WAEAWFAIAPAGWPGGS                      | 311 |
| GmERF54 | FWDDLDPFNNLLLSQLPFVFNQTEFHDAGASSRTQEDNNTFPGSSSPSCPMRPFF              | 406 |
| AtERF53 | FWDDYHFFISNKKDDLDTQSSS—TI—                                           | 339 |

**Figure S1:** Protein sequence alignment of GmERF54 and AtERF53

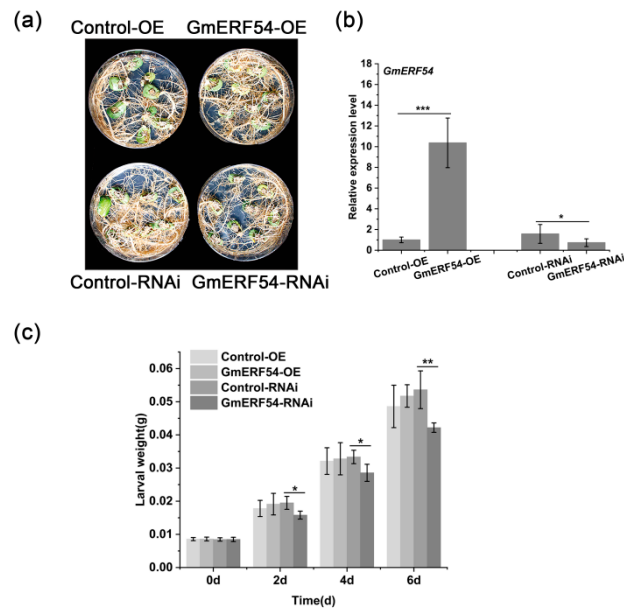

**Figure S2.** *GmERF54* transgenic soybean hairy roots and evaluation of CCW resistance. (a) *GmERF54* transgenic hairy roots. (b) Relative expression level of the *GmERF54* gene in transgenic hairy roots. The qRT-PCR results were relative to the expression level of the Control-OE lines and normalized to the *tubulin* control gene.  $n = 3$ . (c) Average larval weight of CCW feeding on *GmERF54* transgenic hairy roots after 0, 2, 4 and 6 days of feeding.  $n = 4$ . Control-OE: the empty vector pMDC83; GmERF54-OE: over-expression of *GmERF54*; Control-RNAi: the empty vector pB7GWIWG2(II); GmERF54-RNAi: RNA interference of *GmERF54*. A two-tailed *t*-test was used to detect statistical significance. \*:  $p < 0.05$ ; \*\*:  $p < 0.01$ ; \*\*\*:  $p < 0.001$ . Error bars denote  $\pm$  SD.
