# Supplementary material
Source: MDPI journal article supplement (https://www.mdpi.com/2073-4395/13/2/596)
Supplement: s1 [file s1 › Supplementary Table S1~S5.xlsx]

## Sheet: Table S1
Table S1. Primer pairs used in this paper
Gene Names	Sense primers (5'-3')	Antisense primers (5'-3')	Function
GmERF54	ATGGCAAACAACAGTGGAAA	TCAGAAGAAGGGCCTCATGG	CDS isolation
GmERF54	CCCACGATCAGATTCCCTCA	GAACTATGCGAGCAAAAGGGTG	Promoter isolation
GmERF54	ATGGCAAACAACAGTGGAAA	TCACTCCAATACTGAAGAAGC	Gene interference
GmTubulin	GGAGTTCACAGAGGCAGAG	CACTTACGCATCACATAGCA	qRT-PCR
GmERF54	AGGTTCAACATCGAGCCAGAA	CGGTTACAGCGTTTTCTACTGC	qRT-PCR
GmERF54	CCCTCACAGAACATGGGGTA	TCAGAAGAAGGGCCTCATGG	Construction of BD-GmERF54-N vector
GmERF54	ATGGCAAACAACAGTGGAAA	TGCAGGAGCAGTTGTGGAT	Construction of BD-GmERF54-C vector
GmERF54	ATGGCAAACAACAGTGGAAA	TGAAGAAGATGGTCCTCTCCTG	Identification of transgenic hairy roots with pMDC83-GmERF54 vector
GmERF54	GACGCACAATCCCACTATCC	TCACTCCAATACTGAAGAAGC	Identification of transgenic hairy roots with pBI-GmERF54-RNAi vector
GmERF54	ATGGCAAACAACAGTGGAAA	GAAGAAGGGCCTCATGG	Construction of 35S:GmERF54-GFP and GmERF54-YFPN vectors
GmPLT2	ATGAACAACAACTGGCTTTCG	ATCATTCCACATTGTGAACACC	Construction of GmPLT2-YFPC vectors
	CTATTCGATGATGAAGATACCC	AGAGGTGCACGATGCACAGT	Sequencing primers of recombinant pGADT7 vector

## Sheet: Table S2
Table S2. GmERF54 interaction proteins in soybean leaf cDNA library
Gene ID	Gene Annotation	Functional Annotation
Glyma.10g221500	Protein GIGANTEA	Photoperiod
Glyma.18g036400	Ribulose bisphosphate Carboxylase/Oxygenase activase	Chloroplast photosynthesis
Glyma.14g067000	Ribulose bisphosphate Carboxylase/Oxygenase activase	Chloroplast photosynthesis
Glyma.04g053900	Serine/Threonine-protein kinase	Cell division and proliferation ability
Glyma.02g038100	Glutamate--glyoxylate aminotransferase	Photorespiration, carbon metabolism
Glyma.11g111100	Fructose-bisphosphate aldolase	Glycolysis, Calvin cycle
Glyma.05g007100	Carbonic anhydrase	Carbon metabolism
Glyma.04g020300	Plastocyanin	Photosynthesis
Glyma.12g117700	Transcription activator GLK1	Stomatal movement

## Sheet: Table S3
Table S3. GmERF54 interaction proteins in soybean root cDNA library
Gene ID	Gene Annotation	Functional Annotation
Glyma.02g087800	Rubisco assembly factor 2-like	Rubisco enzyme assembly component
Glyma.01g099700	Uracil phosphoribosyltransferase-like	Nucleotide synthesis
Glyma.05g123500	P34cdc2 protein kinase	Cell division and proliferation ability
Glyma.12g056300	AP2-like ethylene-responsive transcription factor PLT2	Root tip stem cell homeostasis

## Sheet: Table S4
Table S4. Motif in GmERF54 promoter of Wanxianbaidongdou
Motif	Position	Strand	Sequence	Functional Annotation
ABRE	335	+	ACGTG	cis-acting element involved in the abscisic acid responsiveness
AT-rich element	755	+	ATAGAAATCAA	binding site of AT-rich DNA binding protein (ATBP-1)
ATCT-motif	1469	-	AATCTAATCC	part of a conserved DNA module involved in light responsiveness
AT~TATA-box	463	-	TATATAAA
Box 4	581	+	ATTAAT	part of a conserved DNA module involved in light responsiveness
CAAT-box	1476	-	CCAAT	common cis-acting element in promoter and enhancer regions
CGTCA-motif	231	+	CGTCA	cis-acting regulatory element involved in the MeJA-responsiveness
E2Fb	1512	+	TTTGCCGC
ERE	598	+	ATTTTAAA
G-Box	334	-	CACGTT	cis-acting regulatory element involved in light responsiveness
GATA-motif	1424	+	GATAGGA	part of a light responsive element
GCN4_motif	1673	-	TGAGTCA	cis-regulatory element involved in endosperm expression
L-box	1523	+	ATCCCACCTAC	part of a light responsive element
MBS	1586	-	CAACTG	MYB binding site involved in drought-inducibility
MBSI	1546	-	aaaAaaC(G/C)GTTA	MYB binding site involved in flavonoid biosynthetic genes regulation
MYB	25	+	CAACCA
MYB-like sequence	984	-	TAACCA
MYC	426	+	CATGTG
Myb	702	-	TAACTG
Myb-binding site	1440	+	CAACAG
Myc	900	-	TCTCTTA
STRE	220	-	AGGGG
TATA-box	33	+	TATA	core promoter element around -30 of transcription start
TCA	1351	+	TCATCTTCAT
TCT-motif	480	-	TCTTAC	part of a light responsive element
TGACG-motif	231	-	TGACG	cis-acting regulatory element involved in the MeJA-responsiveness
Unnamed__1	1356	-	GAATTTAATTAA	60K protein binding site
Unnamed__4	340	+	CTCC
WRE3	63	+	CCACCT
as-1	231	-	TGACG

## Sheet: Table S5
Table S5. Motif in GmERF54 promoter of Nannong 99-10
Motif	Position	Strand	Sequence	Functional Annotation
ABRE	326	+	ACGTG	cis-acting element involved in the abscisic acid responsiveness
ATCT-motif	1457	-	AATCTAATCC	part of a conserved DNA module involved in light responsiveness
AT~TATA-box	454	-	TATATAAA
CAAT-box	1464	-	CCAAT	common cis-acting element in promoter and enhancer regions
CGTCA-motif	222	+	CGTCA	cis-acting regulatory element involved in the MeJA-responsiveness
E2Fb	1500	+	TTTGCCGC
G-Box	325	-	CACGTT	cis-acting regulatory element involved in light responsiveness
GATA-motif	1412	+	GATAGGA	part of a light responsive element
GCN4_motif	1661	-	TGAGTCA	cis-regulatory element involved in endosperm expression
MBS	1574	-	CAACTG	MYB binding site involved in drought-inducibility
MBSI	1534	-	aaaAaaC(G/C)GTTA	MYB binding site involved in flavonoid biosynthetic genes regulation
MYB	16	+	CAACCA
MYB-like sequence	963	-	TAACCA
MYC	417	+	CATGTG
Myb	685	-	TAACTG
Myb-binding site	1428	+	CAACAG
Myc	879	-	TCTCTTA
STRE	211	-	AGGGG
TATA-box	24	+	TATA	core promoter element around -30 of transcription start
TCA	1330	+	TCATCTTCAT
TCT-motif	471	-	TCTTAC	part of a light responsive element
TGACG-motif	222	-	TGACG	cis-acting regulatory element involved in the MeJA-responsiveness
Unnamed__1	1335	-	GAATTTAATTAA	60K protein binding site
Unnamed__4	331	+	CTCC
WRE3	54	+	CCACCT
as-1	222	-	TGACG
